# Supplementary material for: Molecular mechanism of bovine Gasdermin D-mediated pyroptosis
Source: Springer Nature journal article supplement (doi:10.1186/s13567-024-01282-1), 2024-02-27

**A**

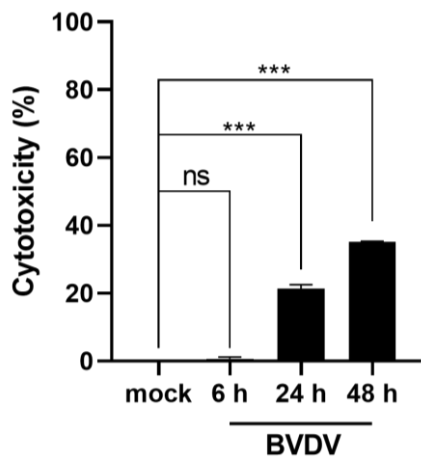

**B**

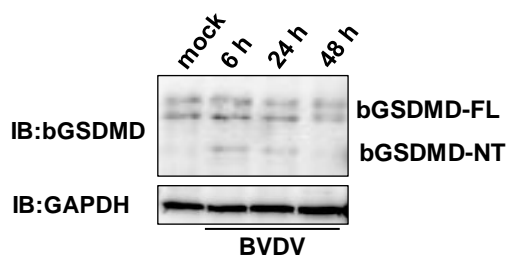

Supplement: MOESM1 [file 13567_2024_1282_MOESM1_ESM.pdf]
