# Supplementary material for: Molecular mechanism of bovine Gasdermin D-mediated pyroptosis
Source: Springer Nature journal article supplement (doi:10.1186/s13567-024-01282-1), 2024-02-27
Supplement: MOESM2 [file 13567_2024_1282_MOESM2_ESM.pdf]

1                    10                    20                    30                    40                    50

GSDMD\_BOVINE MA**SAFEKVVRSV**RELDH. . KDLT**PVDSLW**SS**TFOPYTLLS**RKPL**SSRFWR**PRYK**CVN**L

GSDMD\_SWINE MA**SAFERVVKS**VRELDHG. RELT**PVKSLQ**TS**DRFOPYCLL**G**RKPPSSW**FWRPRYT**CV**DL

GSDMD\_HUMAN MG**SAFERVVRRV**VQELDHG. GEFIT**PVDSLQ**ST**GFOPYCLLV**N**RKPPSSW**FWKPRYK**CVN**L

GSDMD\_MOUSE MP**SAFEKVVKNVI**KEVSGSRG**DLIPVD**SL**RNSTSFR**OPYCLLN**RKFSSSR**FWKPRYS**CVN**L

60                    70                    80                    90                    100                    110

GSDMD\_BOVINE **SIRDILEPDA**PEPA**LECGRT**FQ**FHDAM**DG**QLQGSVK**LAAP**GQGR**LS**GGA**AVS**GSSSA**SMD

GSDMD\_SWINE **SIWDILEPDA**PEPA**VERGGP**FY**FHD**TMDG**QLQGV**ELAAP**GQGF**S**GGA**AVS**GSSSA**SMN

GSDMD\_HUMAN **SIKDILEPDA**AE**PDVQR**GR**SFFHFY**DAM**DGQIQGS**VE**LAAPG**QAKIA**GGA**AVS**DSSST**SMN

GSDMD\_MOUSE **SIKDILEPDA**PE**PEPECF**GS**FKV**SD**VVDGNIQGR**VM**LSGM**GE**GKIS**GGA**AVS**D**SSSA**SMN

120                    130                    140                    150                    160                    170

GSDMD\_BOVINE **LCTLRV**T**PN**T**WE**AM**H**HERR**LRQ**PE**P**KT**LQQL**RSRG**DDVFV**VTEVL**QTQ**KEVE**V**TR**THK**QE

GSDMD\_SWINE **VCTLRV**AP**NT**WDAM**H**LE**RRLRQ**PE**H**KV**LQQL**RSRG**NDV**FVTEVL**QTQ**KEVE**V**TR**THK**QE

GSDMD\_HUMAN **VYSL**SV**DP**NT**WQ**T**LL**HER**H**LR**Q**PE**H**KV**LQQL**RSRG**NDV**YVTEVL**QTQ**KEVE**V**TR**THK**RE

GSDMD\_MOUSE **VCIL**RV**TQ**K**T**WE**TM**Q**HER**H**LQ**PE**N**K**ILQQL**RSRG**DDL**FVTEVL**QT**KE**EVQIT**EV**HS**QE

180                    190                    200                    210                    220                    230

GSDMD\_BOVINE **GSGQ**F**AL**PG**AF**CL**Q**KG**EGH**LS**Q**KK**T**VT**IP**SG**S**T**LAFRA**AQL**VI**GS**D**WD**I**LL**F**PD**DK**QRT

GSDMD\_SWINE **GSGQ**F**AL**PG**AV**SL**Q**GG**QGH**LS**R**KK**T**VT**IP**SG**S**V**IAFR**V**AQL**VI**GS**D**WD**I**LL**F**PD**DK**Q**RT

GSDMD\_HUMAN **GSGR**F**S**LP**GAT**CL**Q**GG**EGH**LS**Q**KK**T**VT**IP**SG**S**T**LAFR**V**AQL**VI**D**SD**LD**V**LL**F**PD**DK**Q**RT

GSDMD\_MOUSE **GSGQ**F**T**LP**GAL**CL**K**GG**EGK**GH**Q**S**R**KK**M**VT**IP**AG**S**I**LAFR**V**AQL**LI**GS**K**WD**I**LL**V**S**DE**K**QRT

240                    250                    260                    270                    280                    290

GSDMD\_BOVINE **FL**SL**Q**AG**RR**P**SS**SA**D**SH**P**H**PC**F**SL**AS**.**IRA**L**SD**Y**F**H**F**Q**P**DG**ST**E**HW**L**AT**TD**D**Y**Q**GL**R**AEV**

GSDMD\_SWINE **FR**PL**R**E**G**HS**A**SH**G**AD**G**Q**P**P**Q**FS**R**LV**S**GM**S**FP**SE**HL**K**F**Q**S**DG**PA**ED**Q**L**V**T**TE**D**F**Q**GL**Q**AEV

GSDMD\_HUMAN **FQ**PP**AT**G**H**K**R**ST**E**GA**W**P**.**.**.**.**QL**PS**G**LS**M**MR**C**L**H**N**F**L**TD**G**.**VP**AE**GA**FT**ED**F**Q**GL**R**AEV**

GSDMD\_MOUSE **FE**PS**SS**G**DR**K**.**.**.**.**AV**G**QR**H**H**GL**N**V**L**A**L**LC**S**I**G**K**Q**LS**L**L**SD**G**I**DE**E**EL**I**E**AA**D**F**Q**GL**Y**AEV**

300                    310                    320                    330                    340                    350

GSDMD\_BOVINE KA**W**AM**G**LE**G**LS**K**GL**C**G**QL**L**G**GL**Q**V**LR**DE**P**AL**Q**A**LE**D**S**LE**Q**GL**C**S**G**.**P**VE**P**R**D**GP**V**GA**I**L

GSDMD\_SWINE DA**W**AA**G**LE**A**LS**R**EP**C**R**QL**L**G**GL**Q**V**LQ**DE**P**AL**Q**A**LE**D**S**LE**Q**GL**C**GG**.**L**V**EP**Q**D**GP**AG**A**ML

GSDMD\_HUMAN ET**I**SK**E**LE**L**LD**R**EL**C**QL**L**LE**G**LE**G**V**LR**D**Q**L**A**L**R**A**LE**E**A**LE**Q**Q**S**LG**.**P**V**EP**L**D**GP**AG**A**VL

GSDMD\_MOUSE KA**C**SS**E**LE**S**LE**M**EL**R**Q**IL**V**N**IG**K**I**LQ**D**Q**PS**M**E**A**LE**A**SL**G**Q**GL**C**S**GG**Q**VE**P**L**D**GP**AG**C**I**L

360                    370                    380                    390                    400                    410

GSDMD\_BOVINE **ES**L**V**L**P**SG**Q**LE**T**EL**A**GP**V**F**Y**LL**Q**AL**AV**L**S**E**A**Q**H**V**LL**A**E**V**L**E**M**GA**L**SG**T**FW**L**VE**S**L**V**E**Q**S**S**

GSDMD\_SWINE **E**CL**V**L**A**CR**R**LE**R**EV**A**GP**I**F**Y**LL**Q**AL**AV**L**N**ET**Q**H**V**LL**A**K**V**LE**T**GA**L**SG**A**L**T**L**V**GS**L**L**E**Q**S**A

GSDMD\_HUMAN **E**CL**V**LS**S**GM**L**VP**E**LA**I**P**V**V**Y**LL**G**AL**T**ML**S**ET**Q**H**K**LL**A**E**A**LES**Q**T**L**L**G**PL**E**L**V**GS**L**L**E**Q**S**A

GSDMD\_MOUSE **E**CL**V**L**D**SG**E**L**V**P**E**LA**A**P**I**F**Y**LL**G**AL**AV**L**S**ET**Q**Q**LL**A**K**A**LE**T**T**V**L**S**K**Q**L**EL**V**K**H**V**L**E**Q**S**T**

420                    430                    440                    450                    460                    470

GSDMD\_BOVINE **PW**QE**H**RA**V**SL**P**P**ER**LG**D**SW**G**SE**AP**GW**AL**LE**A**CG**L**EP**Q**V**G**TP**Q**VC**W**EP**GA**R**G**CA**C**AL**Y**AC**L**

GSDMD\_SWINE **PW**QE**R**RA**V**SL**P**P**T**LL**G**SW**G**SE**AP**I**W**AL**L**EE**CG**L**E**P**Q**V**G**TA**Q**VC**W**EP**EA**Q**S**CR**T**C**AL**Y**A**C**L**

GSDMD\_HUMAN **PW**QE**R**ST**M**SL**P**P**G**LL**G**NS**W**GE**AP**AW**V**LL**EE**CG**L**E**L**GED**T**PH**V**VC**W**EP**QA**Q**S**GR**M**C**AL**Y**A**S**L**

GSDMD\_MOUSE **PW**QE**Q**SS**V**SL**P**T**V**LG**D**C**W**DE**K**N**P**T**W**V**L**LE**EC**GL**R**L**Q**VE**S**P**Q**V**H**W**EP**T**S**L**I**P**T**S**A**L**Y**A**S**L

480

GSDMD\_BOVINE **ALL**LR**LS**Q**LC**.

GSDMD\_SWINE **ALL**LR**LS**Q**LC**.

GSDMD\_HUMAN **ALL**SG**LS**Q**EP**H

GSDMD\_MOUSE **FLL**SS**LG**Q**K**PC
