# Supplementary material for: Molecular mechanism of bovine Gasdermin D-mediated pyroptosis
Source: Springer Nature journal article supplement (doi:10.1186/s13567-024-01282-1), 2024-02-27

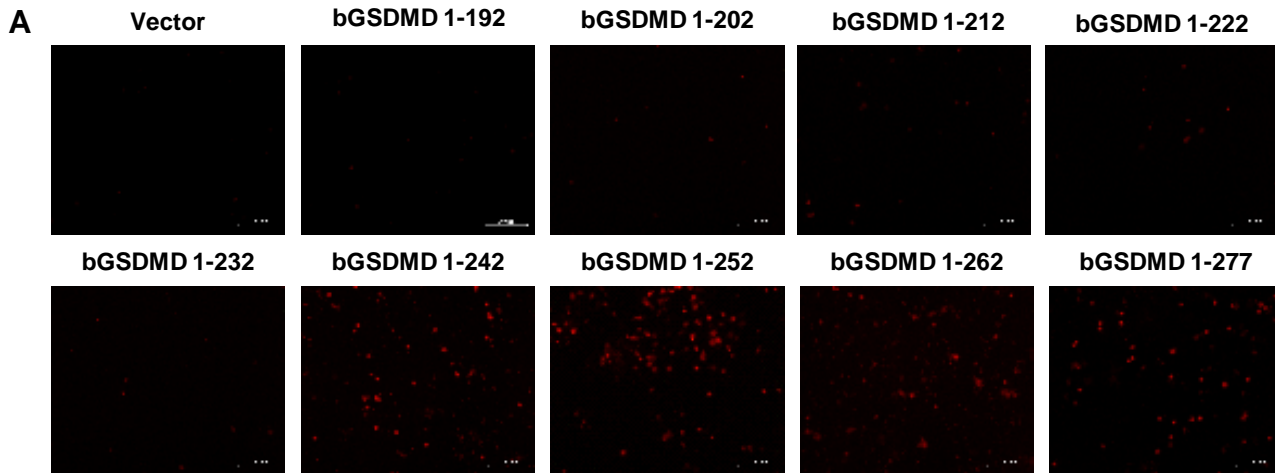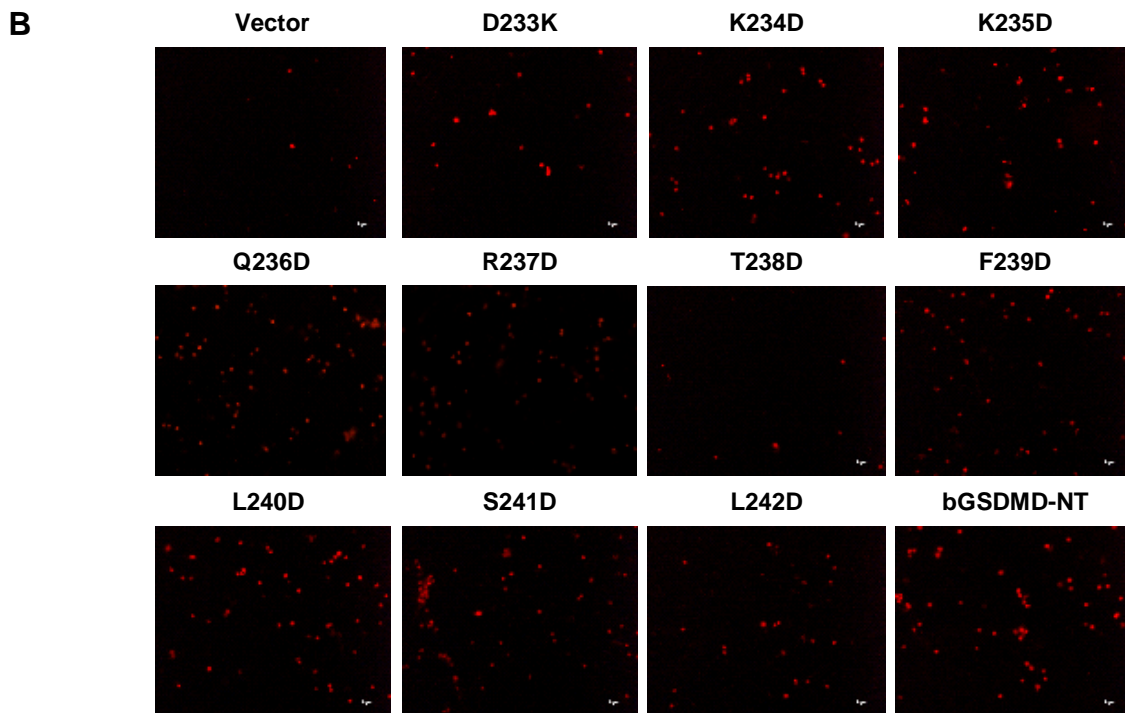

Supplement: MOESM3 [file 13567_2024_1282_MOESM3_ESM.pdf]
